# Supplementary material
Source: MDPI journal article supplement (https://www.mdpi.com/2073-445X/12/7/1332)
Supplement: s1 [file s1 › land-2395079-supplementary.pdf]

## 1. Questionnaire for the beneficiaries

※ The Korean Government plans to implement the payment for ecosystem services (PES) to manage private lands (rice paddies) in an eco-friendly manner within the Dongcheon Estuary Wetlands Protected Area in Suncheon.

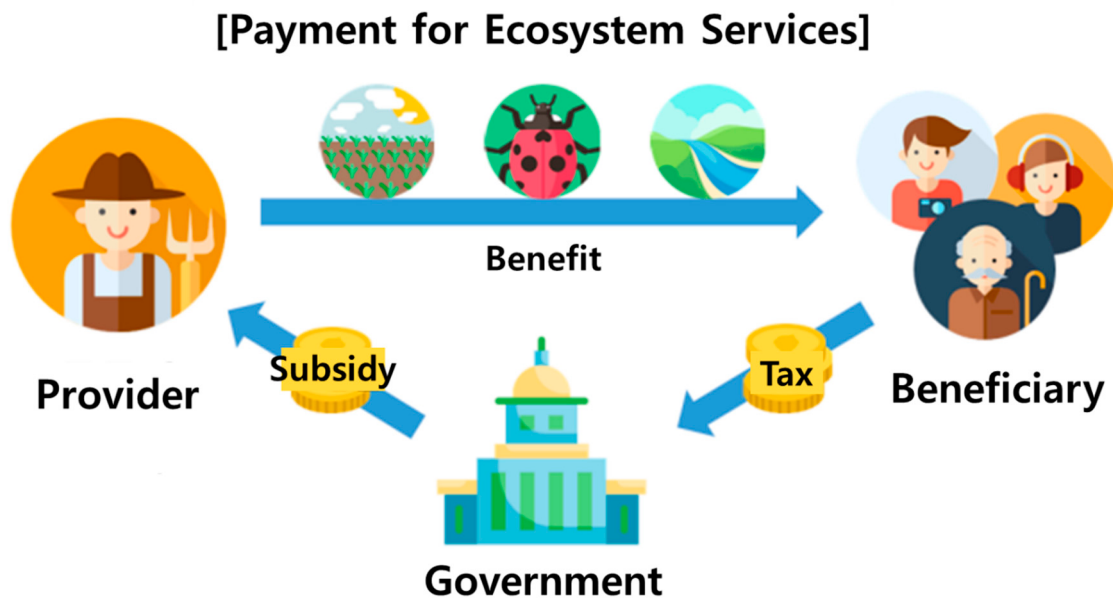

Implementing this policy will benefit residents and visitors as the Dongcheon Estuary Wetlands could be better managed. However, to support this, the beneficiaries will need to pay taxes to the extent of the benefits to the government. The government provides subsidies to the providers (i.e., farmers), who participate in eco-friendly farming practices. Through this policy, the providers can be compensated for the potential financial losses caused by participation in environmentally friendly farming practices, and the beneficiaries can continually enjoy the benefits from the conservation of the environment, such as clean water and well-protected scenery.

The following attributes can affect ecosystem service payment schemes. Please read carefully each description and the level (range) at which it can change. (※ Four attributes (QUAL, ALIEN, DIV, and ADV) refer to the activities of the providers, and additional income tax is the amount the respondents need to pay.)

| Attributes            | Descriptions                                                                                                                                              | Levels                                                                                                                                                                                                   |
|-----------------------|-----------------------------------------------------------------------------------------------------------------------------------------------------------|----------------------------------------------------------------------------------------------------------------------------------------------------------------------------------------------------------|
| QUAL                  | The use of fertilizer to improve water quality by reducing fertilizer to decrease nitrogen (pollutant) emissions                                          | <ul style="list-style-type: none"> <li>• use of 33% fertilizer</li> <li>• use of 66% fertilizer</li> <li>• use of 100% fertilizer *</li> </ul>                                                           |
| ALIEN                 | Farmers' removal of alien species to help reduce their negative impacts on ecosystems.                                                                    | <ul style="list-style-type: none"> <li>• participation</li> <li>• non-participation *</li> </ul>                                                                                                         |
| DIV                   | Farmers' installation of natural drainage or trap water in irrigation channels and drain systems in paddy fields in winter for biodiversity conservation. | <ul style="list-style-type: none"> <li>• participation</li> <li>• non-participation *</li> </ul>                                                                                                         |
| ADV                   | Educating farmers on PES and implementing farming practices                                                                                               | <ul style="list-style-type: none"> <li>• with education</li> <li>• lacking education *</li> </ul>                                                                                                        |
| Additional income tax | Additional income tax per household per year for benefits from provider's PES contract activities                                                         | (0*),<br><ul style="list-style-type: none"> <li>• KRW 1,000(USD 0.9)</li> <li>• KRW 3,000(USD 2.6)</li> <li>• KRW 5,000(USD 4.3)</li> <li>• KRW 7,000(USD 6.0)</li> <li>• KRW 10,000(USD 8.6)</li> </ul> |

\* Current status

**Example.** Given only the three alternatives below for providers to participate in PES, which would you prefer? (Assuming that a change in one attribute does not affect the others).

| Attributes                           | Alternative 1                                                                                                                                    | Alternative 2                                                                                                                                  | Alternative 3                    |
|--------------------------------------|--------------------------------------------------------------------------------------------------------------------------------------------------|------------------------------------------------------------------------------------------------------------------------------------------------|----------------------------------|
| Water quality improvement            | 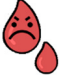<br>use of 100% fertilizer<br>(emissions of 100% of pollutants) | 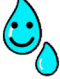<br>use of 33% fertilizer<br>(emissions of 50% of pollutants) | I would not choose either option |
| Removal of alien species             | 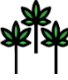<br>non-participation                                           | 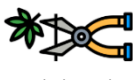<br>participation                                            |                                  |
| Biodiversity conservation activities | 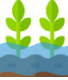<br>Participation                                               | 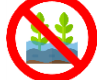<br>non-participation                                         |                                  |
| Technical advice                     | 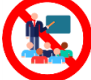<br>lacking education                                           | 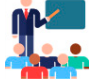<br>with education                                            |                                  |
| Additional income tax                | KRW 3,000                                                                                                                                        | KRW 1,000                                                                                                                                      |                                  |
| Choice                               | <input type="checkbox"/>                                                                                                                         | <input type="checkbox"/>                                                                                                                       | <input type="checkbox"/>         |

## 2. Questionnaire for the providers (i.e., farmers)

※ The Korean Government plans to implement the payment for ecosystem services (PES) to manage private lands (rice paddies) in an eco-friendly manner within the Dongcheon Estuary Wetlands Protected Area in Suncheon.



Implementing this policy will benefit residents and visitors as the Dongcheon Estuary Wetlands could be better managed. However, to support this, the beneficiaries will need to pay taxes to the extent of the benefits to the government. The government provides subsidies to the providers (i.e., farmers), who participate in eco-friendly farming practices. Through this policy, the providers can be compensated for the potential financial losses caused by participation in environmentally friendly farming practices, and the beneficiaries can continually enjoy the benefits from the conservation of the environment, such as clean water and well-protected scenery.

The following attributes can affect ecosystem service payment schemes. Please read carefully each description and the level (range) at which it can change.

| Attributes     | Descriptions                                                                                                                                              | Levels                                                                                                                                                                                                                                                       |
|----------------|-----------------------------------------------------------------------------------------------------------------------------------------------------------|--------------------------------------------------------------------------------------------------------------------------------------------------------------------------------------------------------------------------------------------------------------|
| <b>QUAL</b>    | The use of fertilizer to improve water quality by reducing fertilizer to decrease nitrogen (pollutant) emissions                                          | <ul style="list-style-type: none"> <li>• use of 33% fertilizer</li> <li>• use of 66% fertilizer</li> <li>• use of 100% fertilizer *</li> </ul>                                                                                                               |
| <b>ALIEN</b>   | Farmers' removal of alien species to help reduce their negative impacts on ecosystems.                                                                    | <ul style="list-style-type: none"> <li>• participation</li> <li>• non-participation *</li> </ul>                                                                                                                                                             |
| <b>DIV</b>     | Farmers' installation of natural drainage or trap water in irrigation channels and drain systems in paddy fields in winter for biodiversity conservation. | <ul style="list-style-type: none"> <li>• participation</li> <li>• non-participation *</li> </ul>                                                                                                                                                             |
| <b>ADV</b>     | Educating farmers on PES and implementing farming practices                                                                                               | <ul style="list-style-type: none"> <li>• with education</li> <li>• lacking education *</li> </ul>                                                                                                                                                            |
| <b>Subsidy</b> | Annual subsidy received on the condition that the farmers carry out PES contracts                                                                         | <ul style="list-style-type: none"> <li>(0*),</li> <li>• KRW 1 million (USD 858.1),</li> <li>• KRW 2 million (USD 1,716.2),</li> <li>• KRW 3 million (USD 2,574.3),</li> <li>• KRW 5 million (USD 4,290.5),</li> <li>• KRW 7 million (USD 6,006.5)</li> </ul> |

\* Current status

**Example.** Given only the three alternatives below for the providers (i.e., farmers) to participate in PES, which would you prefer? (Assuming that a change in one attribute does not affect the others).

| Attributes                           | Alternative 1                                                                                                                                    | Alternative 2                                                                                                                                  | Alternative 3                    |
|--------------------------------------|--------------------------------------------------------------------------------------------------------------------------------------------------|------------------------------------------------------------------------------------------------------------------------------------------------|----------------------------------|
| Water quality improvement            | 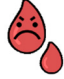<br>use of 100% fertilizer<br>(emissions of 100% of pollutants) | 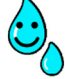<br>use of 33% fertilizer<br>(emissions of 50% of pollutants) | I would not choose either option |
| Removal of alien species             | 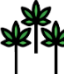<br>non-participation                                           | 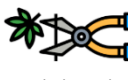<br>participation                                            |                                  |
| Biodiversity conservation activities | 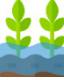<br>Participation                                               | <br>non-participation                                         |                                  |
| Technical advice                     | 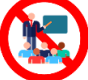<br>lacking education                                           | 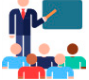<br>with education                                            |                                  |
| Subsidy                              | KRW 3 million                                                                                                                                    | KRW 1 million                                                                                                                                  |                                  |
| Choice                               | <input type="checkbox"/>                                                                                                                         | <input type="checkbox"/>                                                                                                                       | <input type="checkbox"/>         |
